# Supplementary material for: Senescent Human Pancreatic Stellate Cells Secrete CXCR2 Agonist CXCLs to Promote Proliferation and Migration of Human Pancreatic Cancer AsPC-1 and MIAPaCa-2 Cell Lines
Source: MDPI journal article supplement (doi:10.3390/ijms23169275), 2022-08-17
Supplement: s1 [file s1]

**Supplementary Table S1.** Gene list involved in Gene Ontology (GO) such as “Cytokine”, “Growth factor” and “Secreted” in senescence-induced human pancreatic stellate cells (hPSCs) by the treatment with hydrogen peroxide.

| Gene name                                                          |
|--------------------------------------------------------------------|
| C-C motif chemokine ligand 19 (CCL19)                              |
| C-X-C motif chemokine ligand 1 (CXCL1)                             |
| C-X-C motif chemokine ligand 2 (CXCL2)                             |
| C-X-C motif chemokine ligand 3 (CXCL3)                             |
| TNF receptor superfamily member 10a (TNFRSF10A)                    |
| TNF receptor superfamily member 10c (TNFRSF10C)                    |
| TNF superfamily member 18 (TNFSF18)                                |
| interleukin 1 beta (IL1B)                                          |
| interleukin 13 receptor subunit alpha 2 (IL13RA2)                  |
| interleukin 21 (IL21)                                              |
| interleukin 24 (IL24)                                              |
| interleukin 33 (IL33)                                              |
| interleukin 6 receptor (IL6R)                                      |
| platelet factor 4 variant 1 (PF4V1)                                |
| platelet factor 4 (PF4)                                            |
| thymic stromal lymphopoietin (TSLP)                                |
| KIT ligand (KITLG)                                                 |
| Amphiregulin (AREG)                                                |
| cellular communication network factor 3 (CCN3)                     |
| cerebral dopamine neurotrophic factor (CDNF)                       |
| growth differentiation factor 15 (GDF15)                           |
| insulin like growth factor 1 (IGF1)                                |
| interleukin 7 (IL7)                                                |
| placental growth factor (PGF)                                      |
| ADAM metallopeptidase with thrombospondin type 1 motif 5 (ADAMTS5) |
| FAM20A golgi associated secretory pathway pseudokinase (FAM20A)    |
| Fc mu receptor (FCMR)                                              |
| R-spondin 3 (RSPO3)                                                |
| TIMP metallopeptidase inhibitor 4 (TIMP4)                          |
| adhesion G protein-coupled receptor G1 (ADGRG1)                    |
| aldo-keto reductase family 1 member B10 (AKR1B10)                  |
| amylase alpha 1B (AMY1B)                                           |
| amylase alpha 1C (AMY1C)                                           |
| carbonic anhydrase 11 (CA11)                                       |
| carboxyl ester lipase (CEL)                                        |
| carboxypeptidase Z (CPZ)                                           |
| Cholecystokinin (CCK)                                              |
| collagen type IV alpha 6 chain (COL4A6)                            |
| collagen type VI alpha 6 chain (COL6A6)                            |
| complement C1r subcomponent like (C1RL)                            |
| cystatin SA (CST2)                                                 |
| cystatin SN (CST1)                                                 |
| ectonucleotide pyrophosphatase/phosphodiesterase 2 (ENPP2)         |
| fibronectin leucine rich transmembrane protein 2 (FLRT2)           |
| folate receptor gamma (FOLR3)                                      |

laminin subunit beta 4 (LAMB4)  
macrophage stimulating 1 like (pseudogene)(MST1L)  
matrix metallopeptidase 1 (MMP1)  
matrix metallopeptidase 12 (MMP12)  
matrix metallopeptidase 3 (MMP3)  
netrin 5 (NTN5)  
ninjurin 1 (NINJ1)  
papilin, proteoglycan like sulfated glycoprotein (PAPLN)  
pappalysin 1 (PAPPA)  
parathyroid hormone like hormone (PTH LH)  
placenta enriched 1 (PLAC1)  
Proenkephalin (PENK)  
proline rich protein BstNI subfamily 2 (PRB2)  
proline rich protein BstNI subfamily 3 (PRB3)  
proline rich protein BstNI subfamily 4 (PRB4)  
retinoic acid early transcript 1E (RAET1E)  
secreted and transmembrane 1 (SECTM1)  
secreted phosphoprotein 1 (SPP1)  
synuclein alpha (SNCA)  
tenascin N (TNN)

---
